# Supplementary material
Source: publisher figshare collection journal article supplement (https://adisjournals.figshare.com/articles/dataset/_/13669094)
Supplement: Supplementary file 1 [file 4]

# **Real-World Effectiveness and Safety of Insulin Glargine 300 U/mL in Patients with T2D Uncontrolled on NPH or Premixed Insulins as Part of Routine Clinical Practice in Bulgaria: ToUPGRADE Study**

Zdravko Kamenov; Veselina Pehlivanova; Tsvetodara Kuneva; Kiril Kirilov; Roza Bobeva; Julija Stoykova; Svetla Mihalevska

*Slide deck*

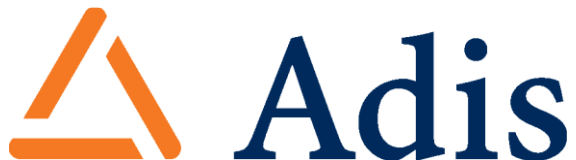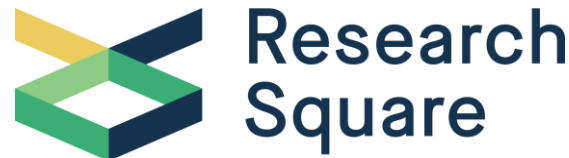

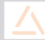

**Second-generation basal insulin analogue**

**Highly effective in controlling HbA1c**

**Minimizes the risk of hypoglycemia**

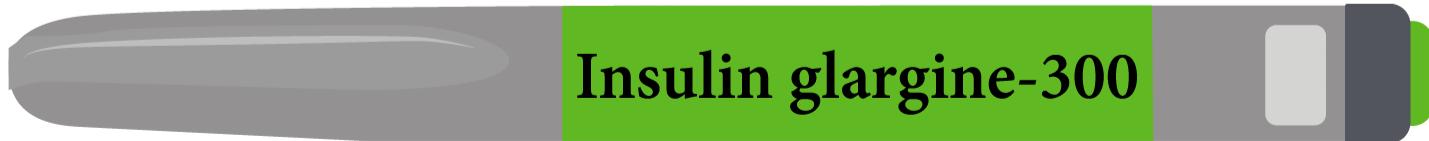

# Real-world study

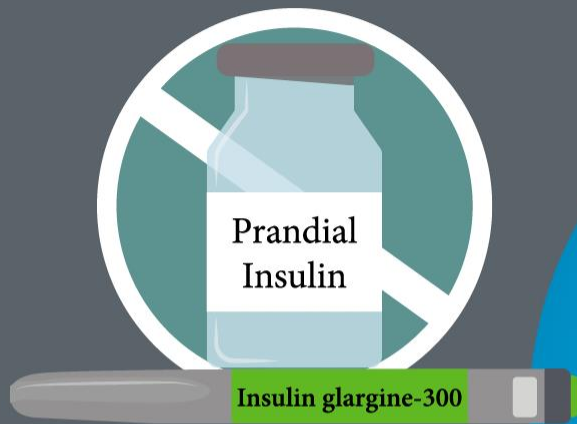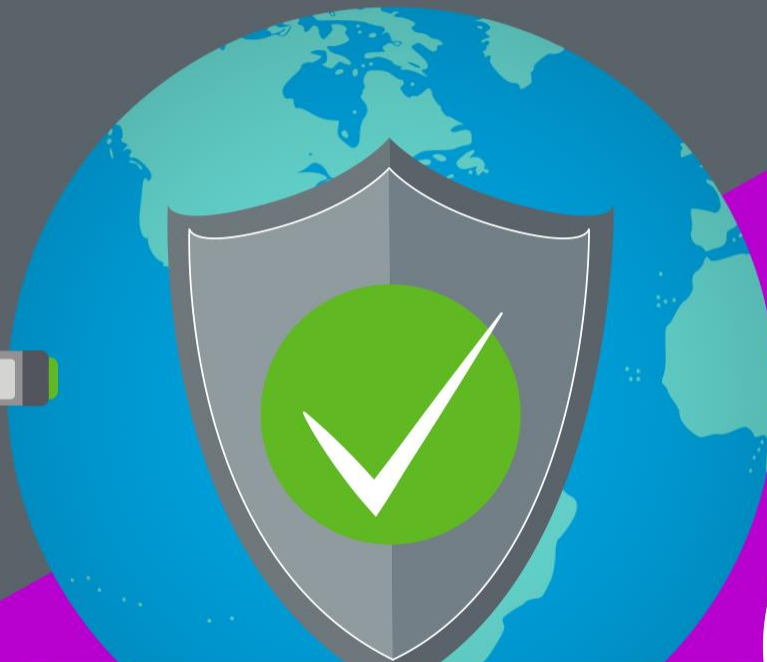

*In patients with type 2 diabetes previously uncontrolled on NPH +/- prandial insulin or premixed insulin treatments*

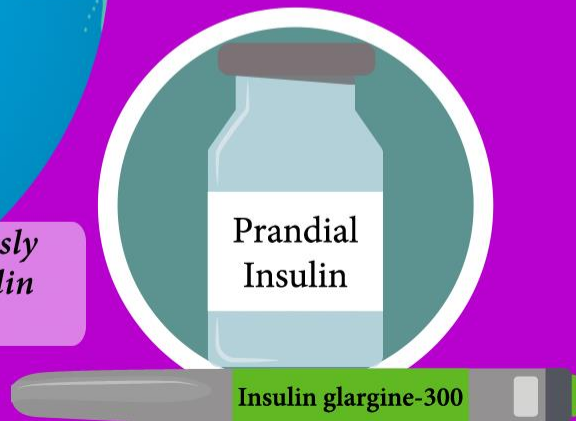

# T-UPGRADE

Conducted  
over 24 weeks

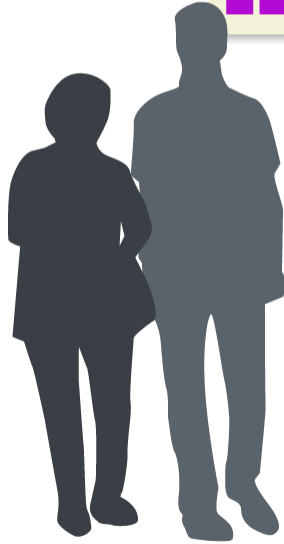

**286 patients**  
with type 2 diabetes  
in Bulgaria

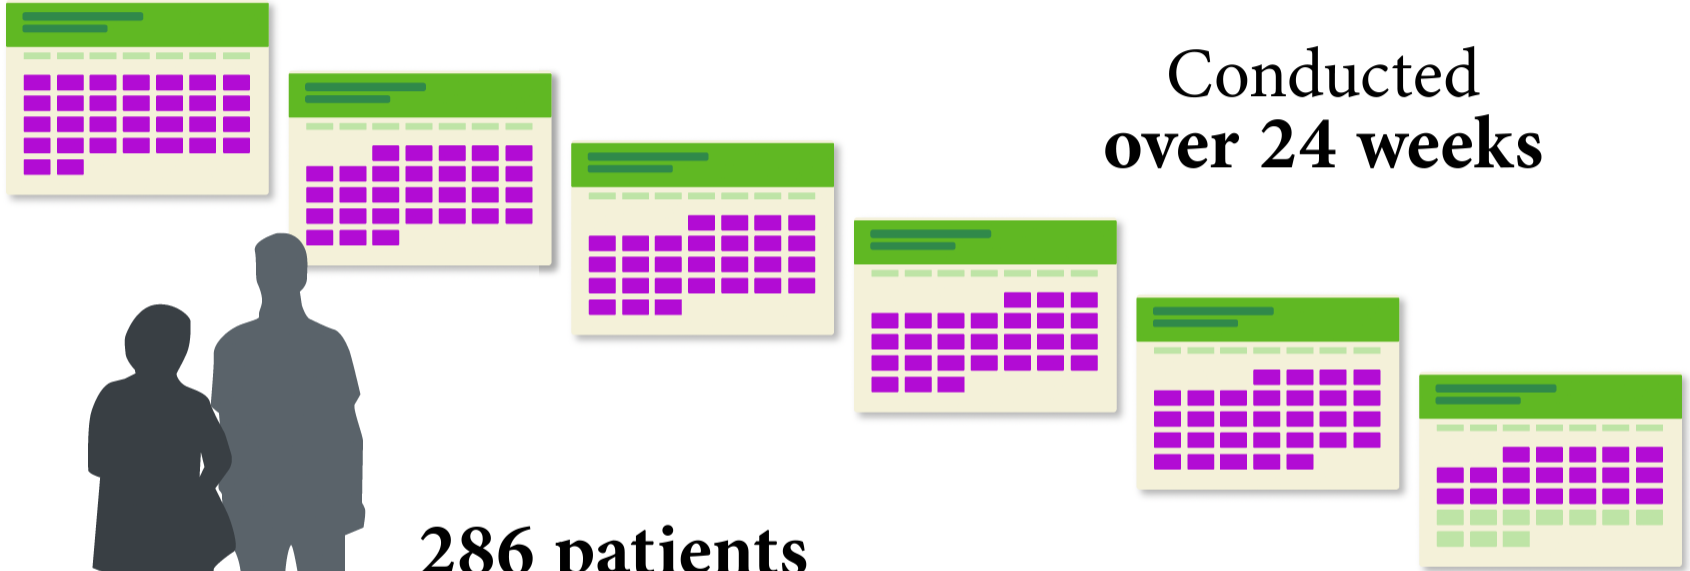

## Baseline

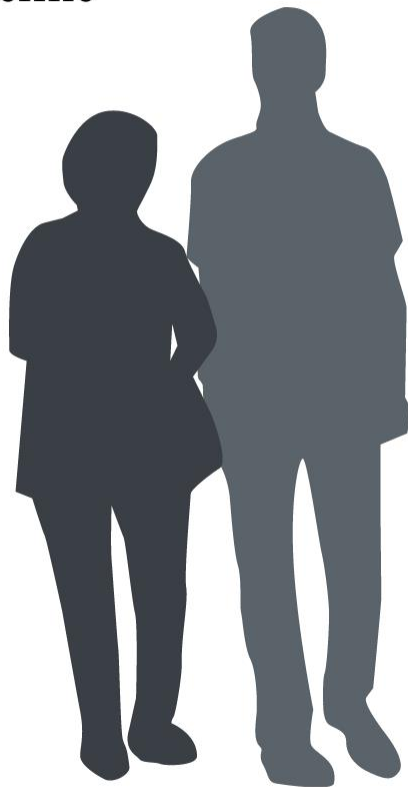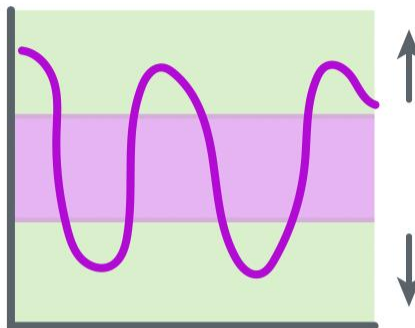

Poor metabolic control

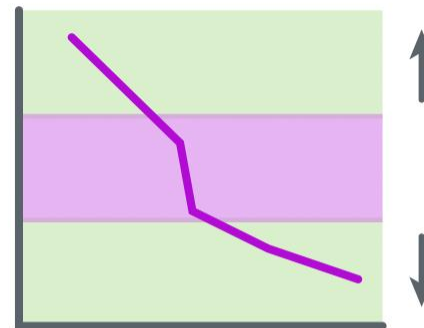

High risk of hypoglycemia

Baseline

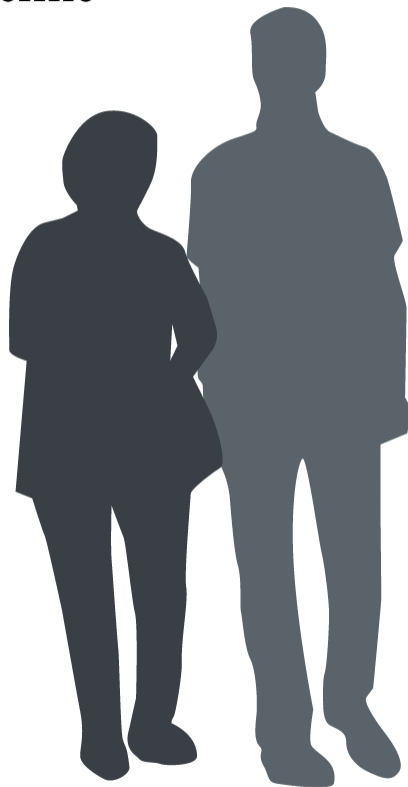

HbA1c

**9.6%**

Fasting plasma  
glucose

**13.1  
mmol/L**

By end of  
24-week study

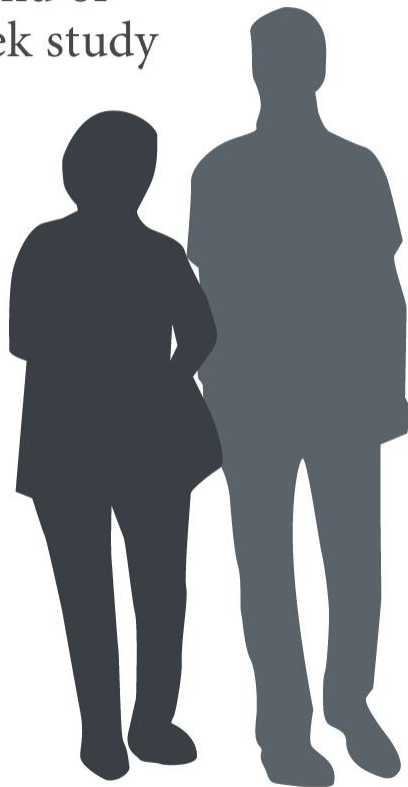

HbA1c

9.6%

-1.9;  $p < 0.001$

**7.9%**

Fasting plasma  
glucose

13.1  
mmol/L

**8.3  
mmol/L**

-4.8;  $p < 0.001$

Separate analyses

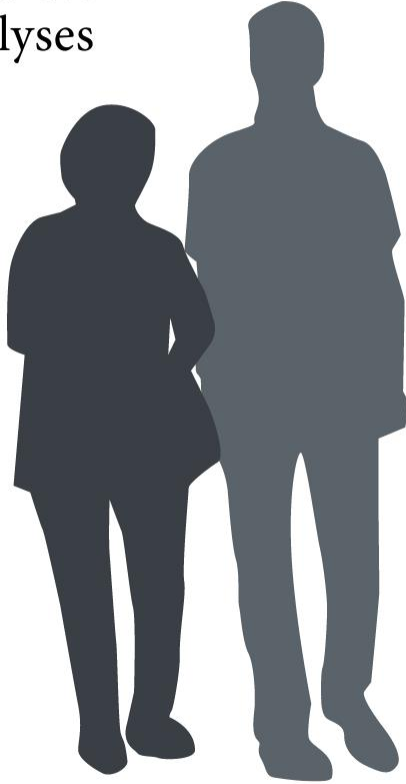

HbA1c

Fasting plasma glucose

NPH pre-treated group

Baseline

9.6%

24 weeks

-1.8; p<0.001

7.8%

Premixed insulin pre-treated group

Baseline

10.2%

24 weeks

-2.0; p<0.001

8.2%

NPH pre-treated group

Baseline

12.5 mmol/L

24 weeks

-4.5; p<0.001

8.0 mmol/L

Premixed insulin pre-treated group

Baseline

14.6 mmol/L

24 weeks

-5.5; p<0.001

9.1 mmol/L



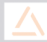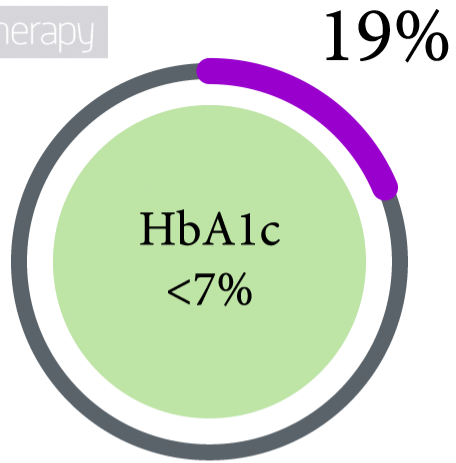

95% CI: 14.6-24.1%

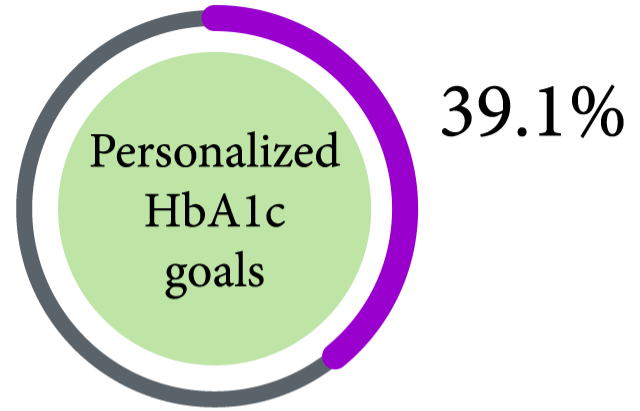

95% CI: 33.3-45.1%

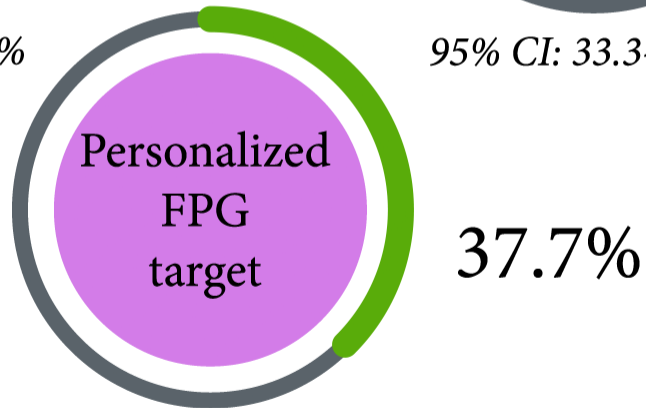

95% CI: 32.0-43.8%

## Statistically significant decrease in overall body weight

88.3 to 87.0 kg from baseline to week 24

**Decrease of 1.3 kg**

$p < 0.001$

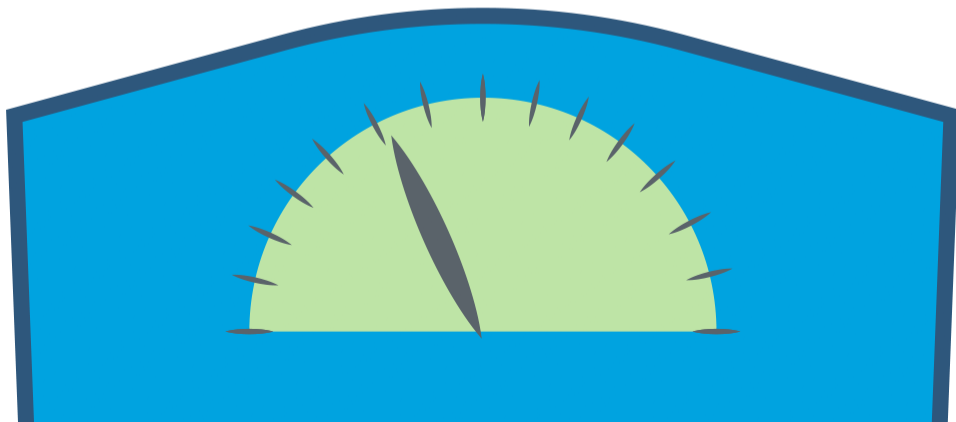

## Rates of hypoglycemia were low

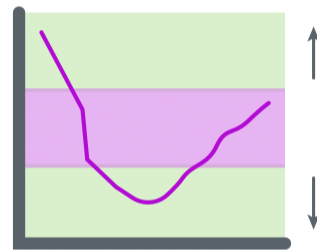

**7.7%** of the patients reported at least one hypoglycemic event\*

and only **1.1%** of patients reported nocturnal hypoglycemia\*

\*confirmed ( $< 3.9$  mmol/L) and or severe

**Premixed insulin  
pretreated patients**

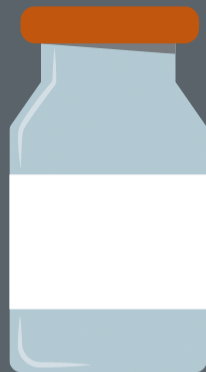

Decrease of 2.2 kg

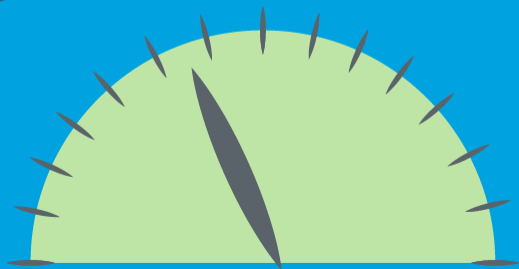

**NPH pretreated  
patients**

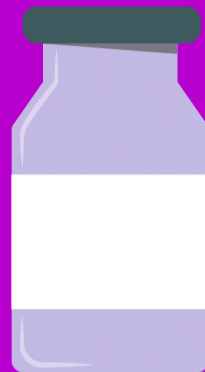

Decrease of 1.0 kg

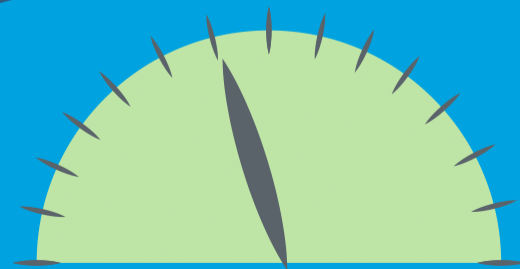

$p=0.045$

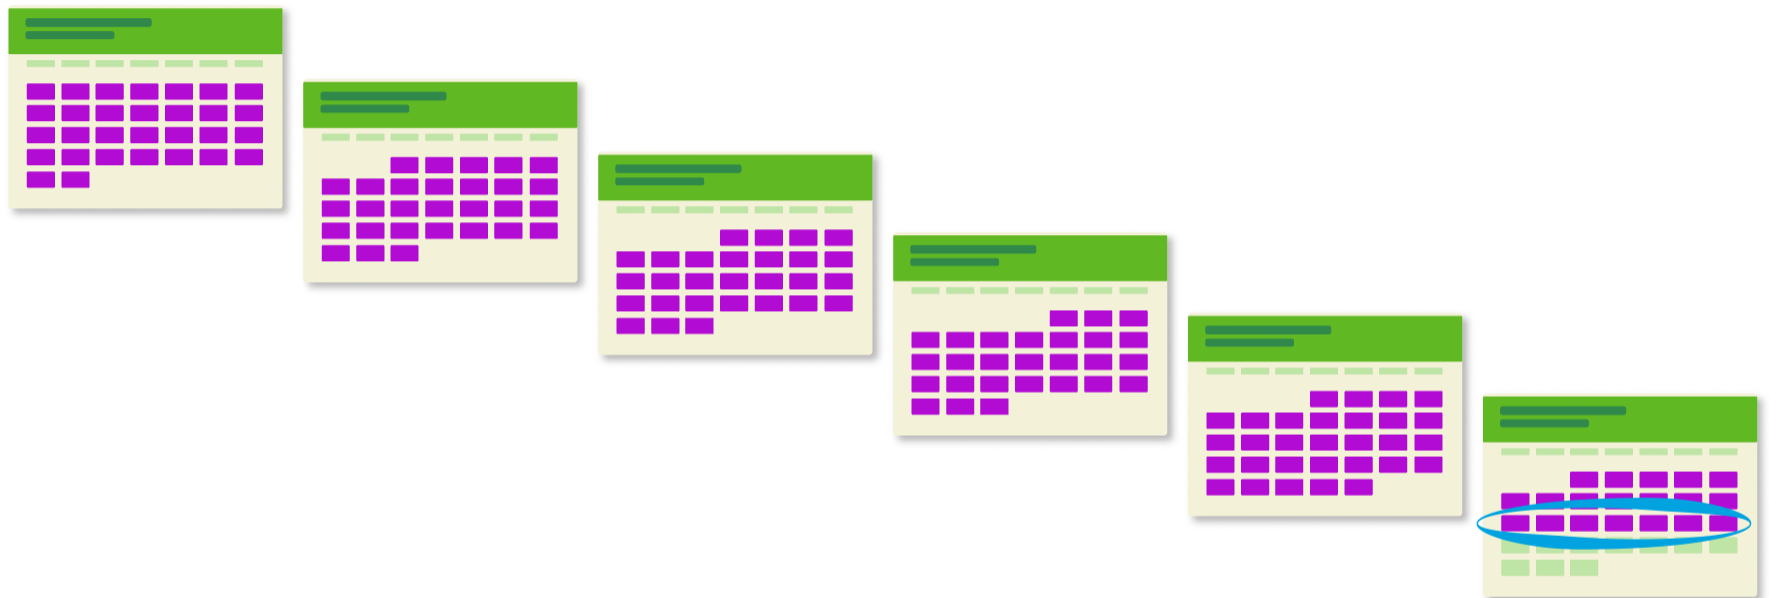

**4 units**

Mean daily increase  
in basal insulin

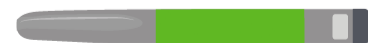

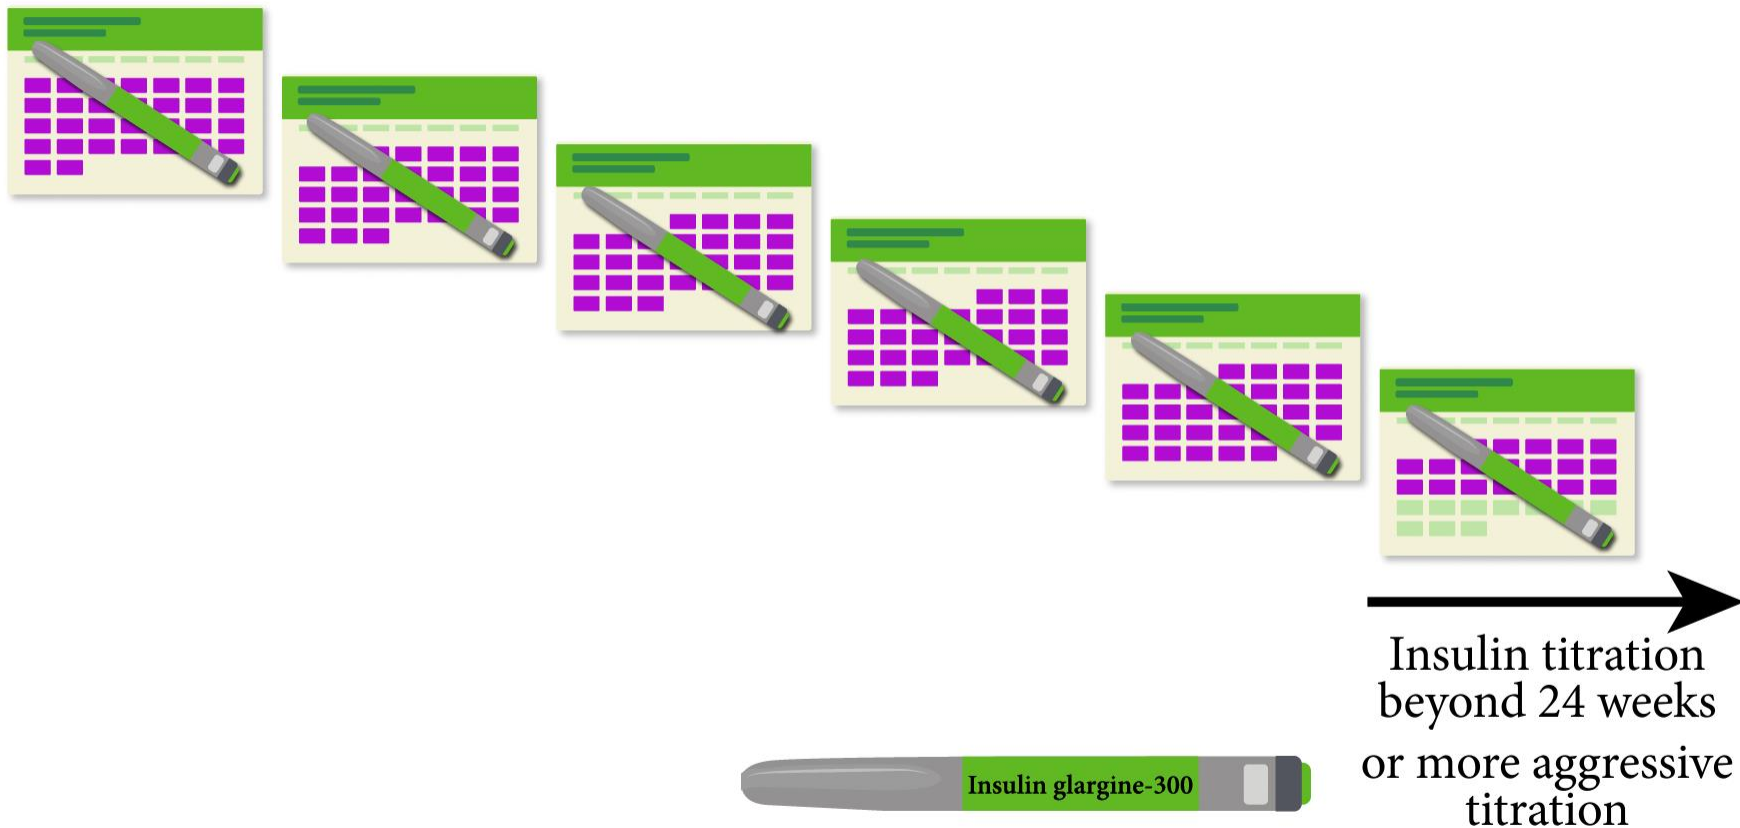

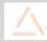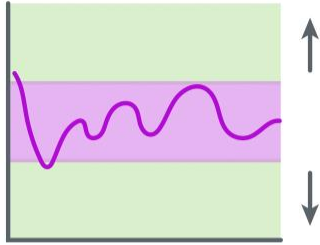

Improved  
glycemic control

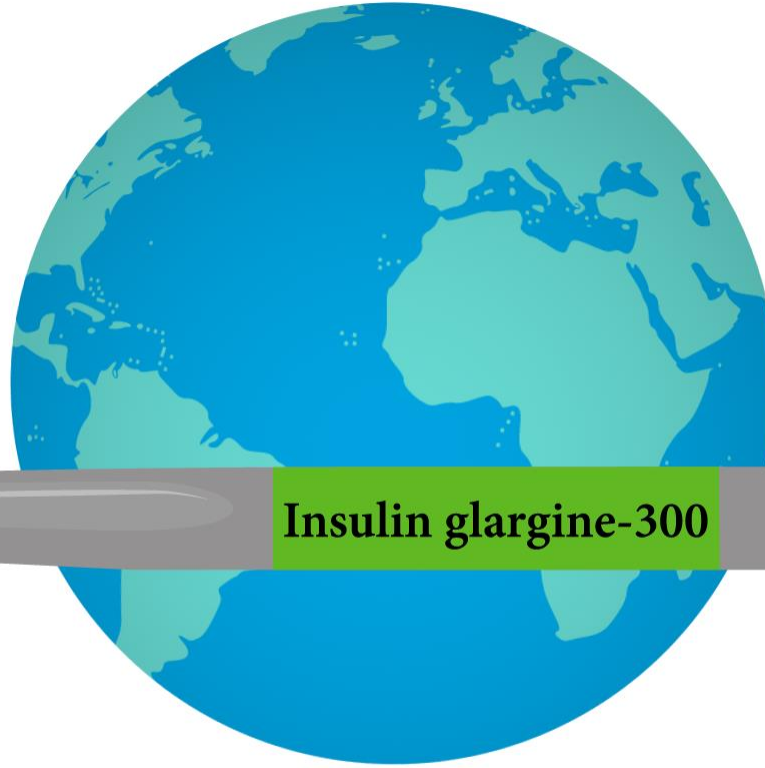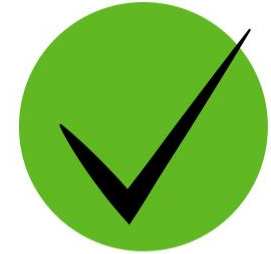

Improved insulin  
treatment  
satisfaction

*In people with type 2 diabetes inadequately controlled on NPH +/- prandial insulin  
or premixed insulin analogues*

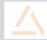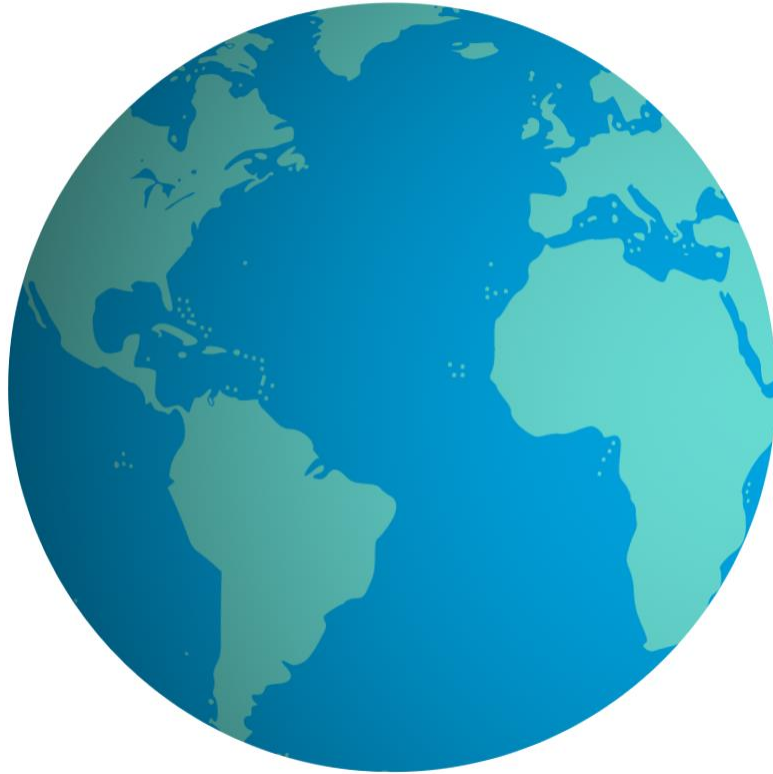

The results confirm other real-world observations indicating that **clinical inertia** and **suboptimal basal insulin titration** may help explain why the majority of patients with type 2 diabetes remain uncontrolled.
